# Supplementary material
Source: PubMed Central journal article supplement (PMC4710541)
Supplement: NIHMS742760-supplement-Supplement1.pdf [file NIHMS742760-supplement-Supplement1.pdf]

## Supplementary Appendix

This appendix has been provided by the authors to give readers additional information about their work.

Supplement to: Ruan J, Martin P, Shah B, et al. Lenalidomide plus rituximab as initial treatment for mantle-cell lymphoma. *N Engl J Med* 2015;373:1835-44. DOI: 10.1056/NEJMoa1505237

## **Supplementary Appendix**

Supplement to: Ruan J, Martin P, Shah B, et al. Lenalidomide Plus Rituximab as Initial Treatment for Mantle Cell Lymphoma

### **Contents**

|                                                                    |        |
|--------------------------------------------------------------------|--------|
| Figures S1 – S3                                                    | Page 2 |
| Tables S1 – S2                                                     | Page 5 |
| Mantle Cell Lymphoma International Prognostic Index (MIPI) and IPI | Page 7 |
| Lymphoma Response Criteria                                         | Page 8 |
| References                                                         | Page 9 |

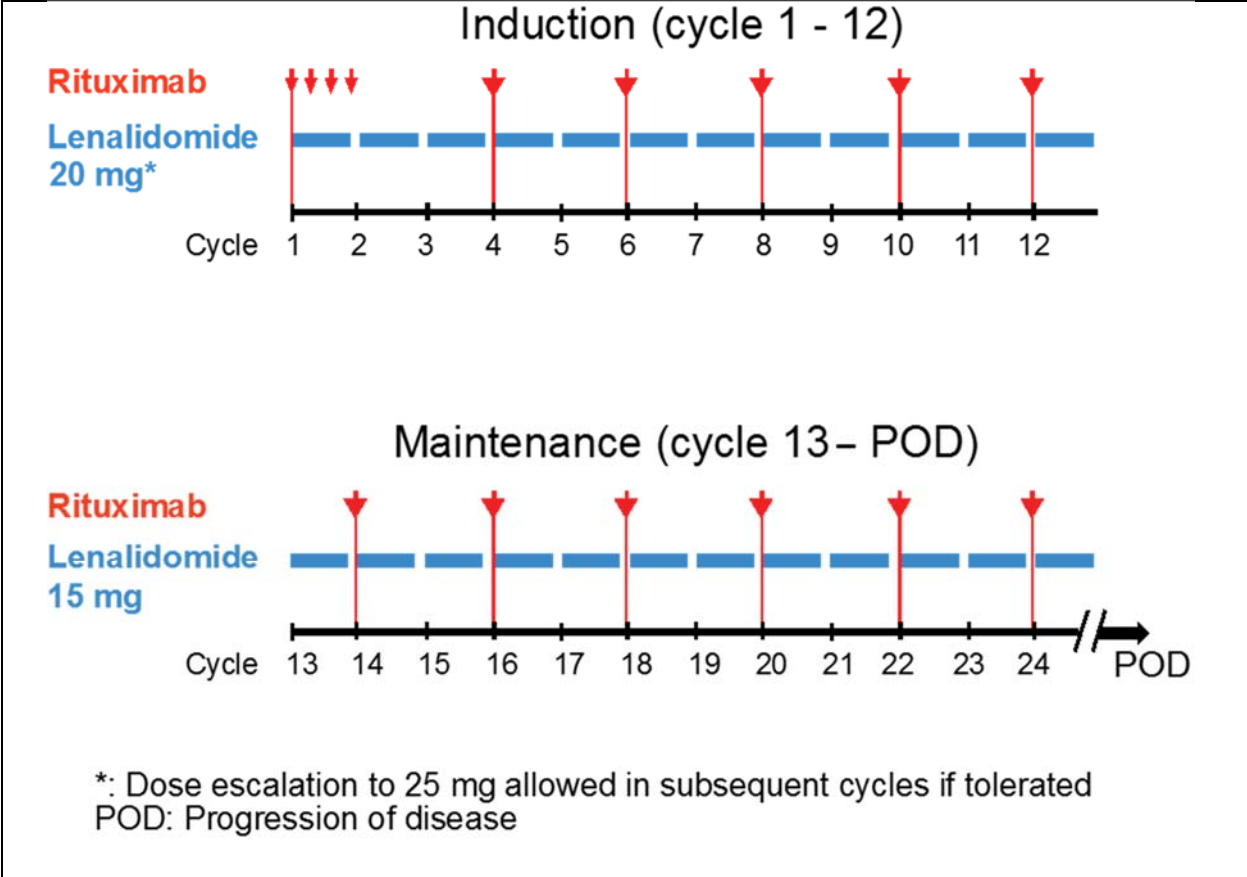

**Figure S1. MCL lenalidomide plus rituximab treatment schedule.** Treatment consisted of induction and maintenance phases. During induction, lenalidomide was administered at 20 mg daily on days 1-21 of a 28-day cycle for a total of 12 cycles, with dose escalation to 25 mg daily if tolerated. Standard dose rituximab was administered weekly x 4 during cycle 1, then once every other cycle, for a total of 9 doses. During maintenance, lenalidomide was administered at 15 mg daily on days 1-21 of a 28-day cycle, with rituximab maintenance once every other cycle until progression of disease.

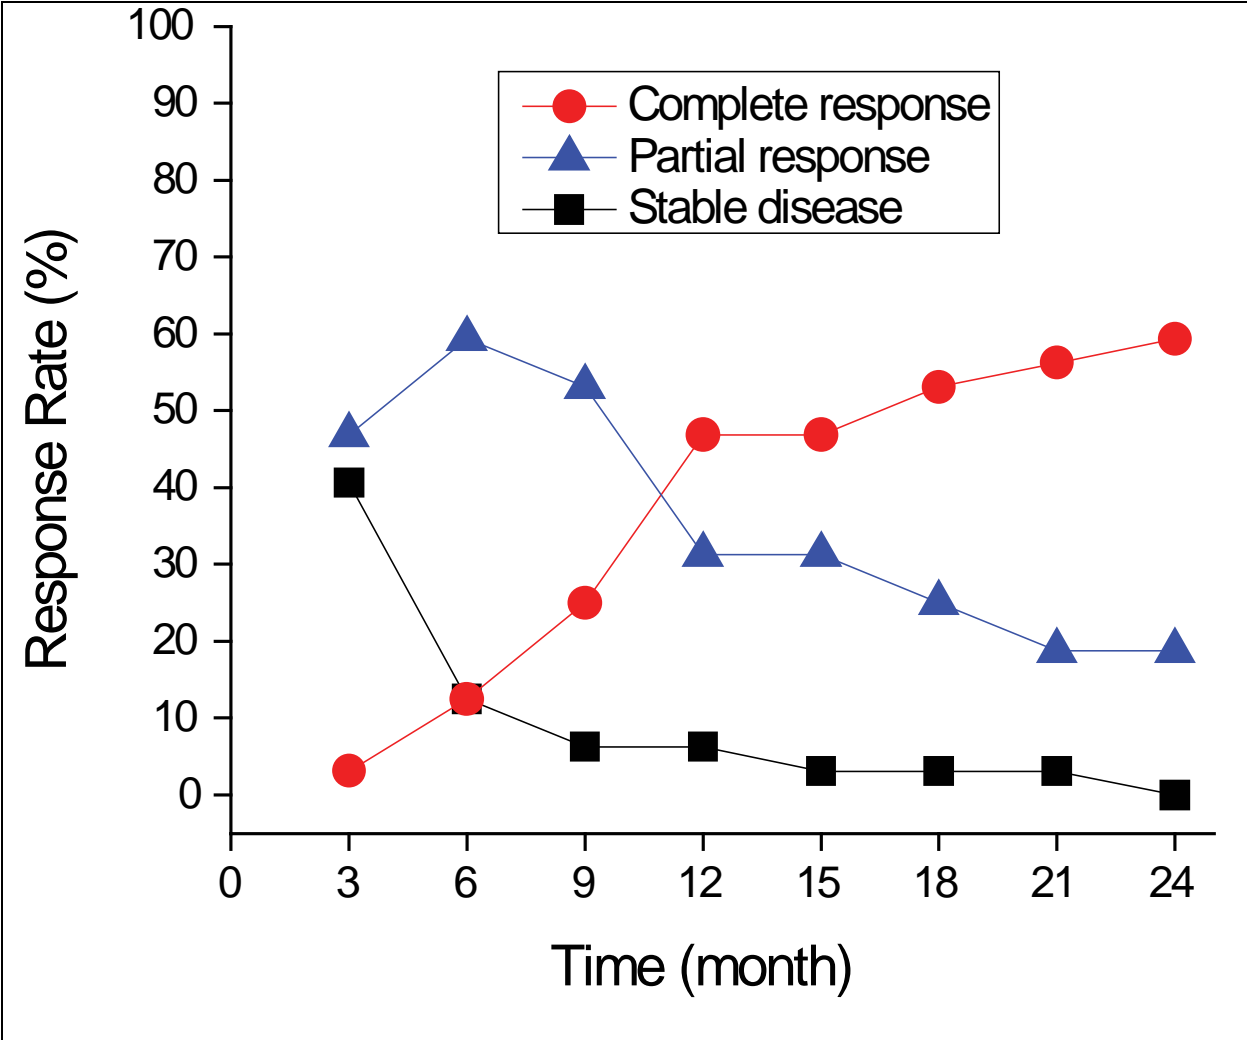

**Figure S2. MCL lenalidomide plus rituximab treatment response curves.** Response curves over time for 24 months, including complete response (red solid circle), partial response (blue solid triangle), and stable disease (black solid square), were plotted for the first 32 patients who have had at least 24 months of follow-up on study.

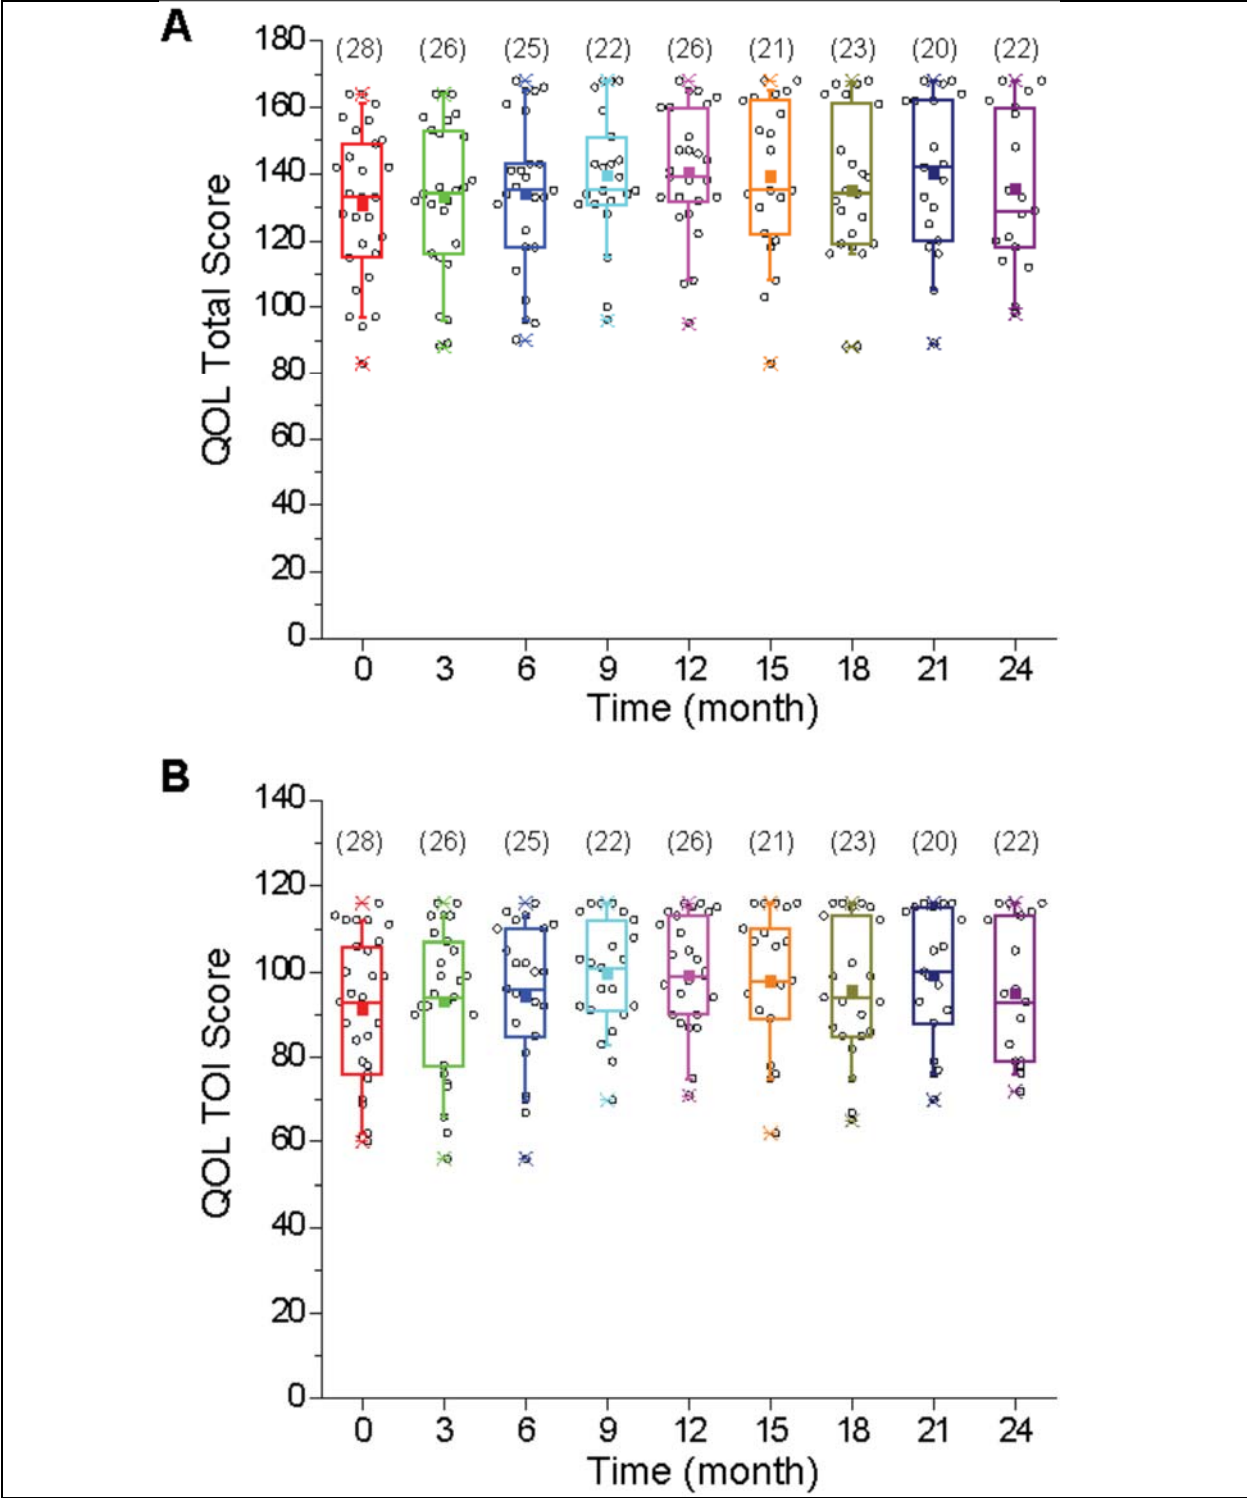

**Figure S3. Health-related Quality-of-Life measurement over time.** The box and whisker plots of the FACT-LYM total score (range 0-168) and modified trial outcome index (TOI, range 0-116), measured at baseline, every 3 months until month 24 for the first 32 patients on study, delineated the impact of therapy on HRQoL. The numbers of the completed questionnaires at each time points were marked on the graph in parentheses.

| <b>Table S1. Severe Adverse Events</b> |                   |                                                    |                    |
|----------------------------------------|-------------------|----------------------------------------------------|--------------------|
| <b>Study Phase</b>                     | <b>Age (year)</b> | <b>Severe Adverse Event</b>                        | <b>Relatedness</b> |
| Induction                              | 74                | Skin squamous cell Carcinoma, left hand            | Possible           |
| Induction                              | 60                | Shortness of breath / Dyspnea                      | Possible           |
| Induction                              | 68                | Cough / hypothyroidism                             | Possible           |
| Induction                              | 86                | Pneumonia                                          | Probable           |
| Induction                              | 70                | Rash                                               | Probable           |
| Induction                              | 66                | Serum Sickness                                     | Probable           |
| Induction                              | 66                | Serum sickness                                     | Possible           |
| Induction                              | 52                | Tumor flare / serum sickness                       | Probable           |
| Induction                              | 66                | Tumor flare                                        | Possible           |
| Induction                              | 74                | Tumor flare                                        | Possible           |
| Induction                              | 66                | Tumor flare                                        | Probable           |
| Induction                              | 81                | Ventricular fibrillation / neutropenic fever       | Possible           |
| Induction                              | 57                | Non-neutropenic fever                              | Possible           |
| Induction                              | 80                | Non-neutropenic fever / transfusion reaction       | Unlikely           |
| Induction                              | 56                | Vertigo                                            | Unlikely           |
| Induction                              | 68                | Non-neutropenic fever                              | Unrelated          |
| Induction                              | 68                | Atrial fibrillation                                | Unrelated          |
| Induction                              | 69                | Blood bilirubin increased                          | Unrelated          |
| Maintenance                            | 62                | Skin Squamous cell carcinoma in situ               | Possible           |
| Maintenance                            | 75                | Skin squamous cell carcinoma, right forehead & jaw | Possible           |
| Maintenance                            | 60                | Skin basal cell carcinoma                          | Unlikely           |
| Maintenance                            | 69                | Pancreatic cancer                                  | Possible           |
| Maintenance                            | 86                | Melanoma in situ                                   | Unlikely           |
| Maintenance                            | 86                | Merkel cell carcinoma                              | Unlikely           |
| Maintenance                            | 70                | Fever                                              | Possible           |
| Maintenance                            | 67                | Cholecystitis / cholangitis / neutropenic fever    | Possible           |
| Maintenance                            | 84                | Pneumonia                                          | Possible           |
| Maintenance                            | 84                | Gastroenteritis                                    | Possible           |
| Maintenance                            | 70                | West Nile virus encephalitis                       | Unlikely           |
| Maintenance                            | 84                | Syncope                                            | Unlikely           |
| Maintenance                            | 84                | Left femoral neck fracture                         | Unrelated          |
| Maintenance                            | 54                | Car accident                                       | Unrelated          |
| Maintenance                            | 60                | Cholecystitis                                      | Unrelated          |

**Table S2. Outcome Following Disease Progression**

| Subject | Age at Relapse (year) | MIPI Risk    | Best Response | Study Duration (month) | Rebiopsy Ki67 | Suspect Blastoid Transformation | Subsequent Therapy    | Survival Status | OS (month) |
|---------|-----------------------|--------------|---------------|------------------------|---------------|---------------------------------|-----------------------|-----------------|------------|
| 1       | 69                    | High         | PD            | 6                      | N/A           | No                              | BVR, ibrutinib        | Alive           | 42+        |
| 2       | 58                    | Low          | PD            | 3                      | N/A           | No                              | BR, autoSCT           | Alive           | 41+        |
| 3       | 66                    | Intermediate | SD            | 3                      | N/A           | No                              | BR                    | Alive           | 23+        |
| 4       | 88                    | High         | CR            | 18                     | N/A           | No                              | Palliation            | Deceased        | 24         |
| 5       | 54                    | Low          | PR            | 14                     | 15-20%        | No                              | Local radiation       | Alive           | 23+        |
| 6       | 66                    | High         | PR            | 25                     | N/A           | No                              | Ibrutinib             | Alive           | 32+        |
| 7       | 72                    | Intermediate | PR            | 28                     | 20%           | No                              | Ibrutinib+palbociclib | Alive           | 32+        |
| 8       | 45                    | Low          | CR            | 39                     | 5%            | No                              | Ibrutinib+palbociclib | Alive           | 40+        |

Abbreviations: BVR – bendamustine, bortezomib, and rituximab; autoSCT – autologous stem cell transplant.

**Mantle Cell Lymphoma International Prognostic Index (MIPI) (Hoster, 2008)**

MIPI score = [0.03535 x age (years)]  
+ [0.6978 (if ECOG >1)]  
+ [1.367 x log<sub>10</sub>(LDH/ULN)]  
+ [0.9393 x log<sub>10</sub>(WBC count per 10<sup>-6</sup> L)]

| <b>MIPI Score</b> | <b>Risk Group</b> |
|-------------------|-------------------|
| < 5.7             | Low risk          |
| ≥ 5.7 and < 6.2   | Intermediate risk |
| ≥ 6.2             | High risk         |

**International Prognostic Index (IPI) (NEJM, 1993)**

One point is assigned for each of the following risk factors:

- Age greater than 60 years
- Stage III or IV disease
- Elevated serum LDH
- Eastern Cooperative Oncology Group performance status of 2, 3, or 4
- More than 1 extranodal site

| <b>IPI Score</b> | <b>Risk Group</b>      |
|------------------|------------------------|
| 0 - 1            | Low risk               |
| 2                | Low-intermediate risk  |
| 3                | High-intermediate risk |
| 4 - 5            | High risk              |



| <b>Lymphoma Response Criteria (Cheson, 2007)</b>                                                                                                                                                                                                                                       |                                                                             |                                                                                                                                                                                                                                                                         |                                                                                                                              |                                                                                  |
|----------------------------------------------------------------------------------------------------------------------------------------------------------------------------------------------------------------------------------------------------------------------------------------|-----------------------------------------------------------------------------|-------------------------------------------------------------------------------------------------------------------------------------------------------------------------------------------------------------------------------------------------------------------------|------------------------------------------------------------------------------------------------------------------------------|----------------------------------------------------------------------------------|
| <b>Response</b>                                                                                                                                                                                                                                                                        | <b>Definition</b>                                                           | <b>Nodal Masses</b>                                                                                                                                                                                                                                                     | <b>Spleen, Liver</b>                                                                                                         | <b>Bone Marrow</b>                                                               |
| CR                                                                                                                                                                                                                                                                                     | Disappearance of all evidence of disease                                    | 1) FDG-avid or PET positive prior to therapy; mass of any size permitted if PET negative<br>2) Variably FDG-avid or PET-negative; regression to normal size on CT                                                                                                       | Not palpable, nodules disappeared                                                                                            | Infiltrate cleared on repeat biopsy; IHC negative if indeterminate by morphology |
| PR                                                                                                                                                                                                                                                                                     | Regression of measurable disease and no new sites                           | ≥ 50% decrease in SPD of up to 6 largest dominant masses; no increase in size of other nodes<br>1) FDG-avid or PET positive prior to therapy; one or more PET positive at previously involved site<br>2) Variably FDG-avid or PET negative; regression on CT            | ≥ 50% decrease in SPD or nodules (for single nodule in greatest transverse diameter); no increase in size of liver or spleen | Irrelevant if positive prior to therapy; cell type should be specified           |
| SD                                                                                                                                                                                                                                                                                     | Failure to attain CR/PR or PD                                               | 1) FDG-avid or PET positive prior to therapy; PET positive at prior sites of disease and no new sites on CT or PET<br>2) Variably FDG-avid or PET negative; no change in size of previous lesions on CT                                                                 |                                                                                                                              |                                                                                  |
| PD                                                                                                                                                                                                                                                                                     | Any new lesion or increase by ≥ 50% of previously involved sites from nadir | Appearance of a new lesion(s) > 1.5 cm in any axis, ≥ 50% increase in SPD of more than one node, or ≥ 50% increase in longest diameter of a previously identified node > 1 cm in short axis; lesions PET positive if FDG-avid lymphoma or PET positive prior to therapy | > 50% increase from nadir in the SPD of any previous lesions                                                                 | New or recurrent involvement                                                     |
| Abbreviations: CR, complete remission; PR, partial remission; SD, stable disease; PD, progressive disease; FDG, [ <sup>18</sup> F]fluorodeoxyglucose; PET, positron emission tomography; CT, computed tomography; SPD, sum of the product of the diameters; IHC, immunohistochemistry. |                                                                             |                                                                                                                                                                                                                                                                         |                                                                                                                              |                                                                                  |

## References

Hoster E, Dreyling M, Klapper W, et al. A New Prognostic Index (MIPI) for Patients with Advanced-stage Mantle Cell Lymphoma. *Blood*. 2008;111:558-65.

A Predictive Model for Aggressive Non-Hodgkin's Lymphoma. The International Non-Hodgkin's Lymphoma Prognostic Factor Project. *New England Journal of Medicine* 1993;329:987-94

Cheson BD, Pfistner B, Juweid ME, et al. Revised Response Criteria for Malignant Lymphoma. *Journal of Clinical Oncology*. 2007;25:579-86.
